# Supplementary material for: Effects of foliar applied asparagine, glycine and citric acid on cadmium uptake and yield in wheat
Source: PeerJ. 2025 Nov 20;13:e20102. doi: 10.7717/peerj.20102 (PMC12640637; doi:10.7717/peerj.20102)
Supplement: Supplemental Information 1 [file peerj-13-20102-s001.xlsx]

## Sheet: Grain Yield
			Grain yield, g plant-1
	applications	soil Cd doses
	control	0	5.46
			4.38
			4.92
	Glycine	0	5.43
			4.79
			5.11
	aspargine	0	5.68
			4.76
			5.22
	citric acid	0	5.34
			4.24
			4.79
	control	3	4.7
			3.74
			4.22
	Glycine	3	4.9
			4.18
			4.54
	aspargine	3	5.19
			4.09
			4.64
	citric acid	3	4.96
			4
			4.48
	control	12	4.49
			3.65
			4.07
	Glycine	12	4.83
			4.07
			4.45
	aspargine	12	4.63
			3.99
			4.31
	citric acid	12	4.5
			3.92
			4.21
