# Supplementary material for: Effects of foliar applied asparagine, glycine and citric acid on cadmium uptake and yield in wheat
Source: PeerJ. 2025 Nov 20;13:e20102. doi: 10.7717/peerj.20102 (PMC12640637; doi:10.7717/peerj.20102)
Supplement: Supplemental Information 2 [file peerj-13-20102-s002.xlsx]

## Sheet: Grain N
	applications	soil Cd doses	Grain N, %
	control	0	1.92
			1.56
			1.74
	Glycine	0	1.96
			1.74
			1.85
	aspargine	0	2.4
			2.06
			2.23
	citric acid	0	1.96
			1.78
			1.6
	control	3	1.99
			1.84
			1.69
	Glycine	3	2.06
			1.82
			1.94
	aspargine	3	2.22
			2
			2.11
	citric acid	3	2.12
			1.86
			1.99
	control	12	1.9
			1.66
			1.78
	Glycine	12	1.92
			1.7
			1.81
	aspargine	12	2.15
			1.87
			2.01
	citric acid	12	2
			1.78
			1.89
