# Supplementary material for: Effects of foliar applied asparagine, glycine and citric acid on cadmium uptake and yield in wheat
Source: PeerJ. 2025 Nov 20;13:e20102. doi: 10.7717/peerj.20102 (PMC12640637; doi:10.7717/peerj.20102)
Supplement: Supplemental Information 3 [file peerj-13-20102-s003.xlsx]

## Sheet: Grain Cd
			Grain Cd, µg kg-1
	applications	soil Cd doses
	control	0	71
			53
			62
	Glycine	0	47
			43
			45
	aspargine	0	58
			50
			54
	citric acid	0	48
			44
			46
	control	3	10042
			9610
			9826
	Glycine	3	8563
			8319
			8441
	aspargine	3	7749
			7243
			7496
	citric acid	3	7333
			7091
			7212
	control	12	13827
			13441
			13634
	Glycine	12	12431
			11747
			12089
	aspargine	12	11975
			11399
			11687
	citric acid	12	14091
			13613
			13852
