# Supplementary material for: Effects of foliar applied asparagine, glycine and citric acid on cadmium uptake and yield in wheat
Source: PeerJ. 2025 Nov 20;13:e20102. doi: 10.7717/peerj.20102 (PMC12640637; doi:10.7717/peerj.20102)
Supplement: Supplemental Information 4 [file peerj-13-20102-s004.xlsx]

## Sheet: Grain Cu
	applications	soil Cd doses	Cu, mg kg-1
	control	0	4.5
			3.9
			4.2
	Glycine	0	2.65
			3.14
			2.9
	aspargine	0	2.8
			2.4
			2.6
	citric acid	0	2.69
			2.2
			2.4
	control	3	5.4
			4.8
			5.1
	Glycine	3	3.8
			4.1
			3.75
	aspargine	3	4.63
			4.4
			4.51
	citric acid	3	3.9
			3.65
			3.78
	control	12	5.1
			3.9
			4.5
	Glycine	12	3.21
			2.59
			2.9
	aspargine	12	2.4
			2
			2.2
	citric acid	12	2.89
			2.72
			2.82
