# Supplementary material for: Effects of foliar applied asparagine, glycine and citric acid on cadmium uptake and yield in wheat
Source: PeerJ. 2025 Nov 20;13:e20102. doi: 10.7717/peerj.20102 (PMC12640637; doi:10.7717/peerj.20102)
Supplement: Supplemental Information 5 [file peerj-13-20102-s005.xlsx]

## Sheet: Grain Fe
	applications	soil Cd doses	Fe, mg kg-1
	control	0	41.3
			33.9
			37.6
	Glycine	0	50.8
			44.4
			47.6
	aspargine	0	48.8
			39.6
			44.2
	citric acid	0	49.2
			42.3
			45.9
	control	3	41.6
			37.89
			39.3
	Glycine	3	55.3
			48.9
			52.1
	aspargine	3	56.2
			55.2
			55.91
	citric acid	3	56.6
			46.8
			51.7
	control	12	50.6
			42.2
			46.4
	Glycine	12	59.4
			49.8
			54.6
	aspargine	12	63
			54.4
			58.7
	citric acid	12	58.33
			50.6
			54.21
