# Supplementary material for: Effects of foliar applied asparagine, glycine and citric acid on cadmium uptake and yield in wheat
Source: PeerJ. 2025 Nov 20;13:e20102. doi: 10.7717/peerj.20102 (PMC12640637; doi:10.7717/peerj.20102)
Supplement: Supplemental Information 6 [file peerj-13-20102-s006.xlsx]

## Sheet: Grain Zn
	applications	soil Cd doses	Zn, mg kg-1
	control	0	11.8
			10.4
			9
	Glycine	0	14.5
			12.9
			13.7
	aspargine	0	16.2
			12.8
			14.5
	citric acid	0	13.5
			9.9
			11.7
	control	3	12.9
			10.7
			11.8
	Glycine	3	14
			12.2
			13.1
	aspargine	3	17.4
			14.83
			16.1
	citric acid	3	14.1
			11.7
			12.9
	control	12	12.33
			15.3
			13.8
	Glycine	12	17
			14
			15.5
	aspargine	12	16.2
			14
			15.75
	citric acid	12	17.8
			15.52
			16.61
