# Supplementary material for: Effects of foliar applied asparagine, glycine and citric acid on cadmium uptake and yield in wheat
Source: PeerJ. 2025 Nov 20;13:e20102. doi: 10.7717/peerj.20102 (PMC12640637; doi:10.7717/peerj.20102)
Supplement: Supplemental Information 7 [file peerj-13-20102-s007.xlsx]

## Sheet: Grain Mn
	applications	soil Cd doses	Mn, mg kg-1
	control	0	40.7
			34.1
			37.4
	Glycine	0	34.2
			31.05
			28.48
	aspargine	0	30.2
			24.6
			27.51
	citric acid	0	21.3
			28.6
			24.9
	control	3	38.01
			36.4
			37.26
	Glycine	3	30
			28.2
			29.1
	aspargine	3	29.8
			27.6
			28.7
	citric acid	3	27.3
			24.9
			26.1
	control	12	42.4
			36.2
			39.3
	Glycine	12	30.63
			28.17
			29.4
	aspargine	12	31.2
			25.4
			28.3
	citric acid	12	27.8
			25.8
			26.8
