# Supplementary material for: Effects of foliar applied asparagine, glycine and citric acid on cadmium uptake and yield in wheat
Source: PeerJ. 2025 Nov 20;13:e20102. doi: 10.7717/peerj.20102 (PMC12640637; doi:10.7717/peerj.20102)
Supplement: Supplemental Information 8 [file peerj-13-20102-s008.xlsx]

## Sheet: Grain Yield
	applications	soil Cd doses	Grain yield
	control	0	5.46
			4.38
			4.92
	Glycine	0	5.43
			4.79
			5.11
	aspargine	0	5.68
			4.76
			5.22
	citric acid	0	5.34
			4.24
			4.79
	control	3	4.7
			3.74
			4.22
	Glycine	3	4.9
			4.18
			4.54
	aspargine	3	5.19
			4.09
			4.64
	citric acid	3	4.96
			4
			4.48
	control	12	4.49
			3.65
			4.07
	Glycine	12	4.83
			4.07
			4.45
	aspargine	12	4.63
			3.99
			4.31
	citric acid	12	4.5
			3.92
			4.21

## Sheet: Grain N
	applications	soil Cd doses	Grain N
	control	0	1.92
			1.56
			1.74
	Glycine	0	1.96
			1.74
			1.85
	aspargine	0	2.4
			2.06
			2.23
	citric acid	0	1.96
			1.78
			1.6
	control	3	1.99
			1.84
			1.69
	Glycine	3	2.06
			1.82
			1.94
	aspargine	3	2.22
			2
			2.11
	citric acid	3	2.12
			1.86
			1.99
	control	12	1.9
			1.66
			1.78
	Glycine	12	1.92
			1.7
			1.81
	aspargine	12	2.15
			1.87
			2.01
	citric acid	12	2
			1.78
			1.89

## Sheet: Grain Cd
	applications	soil Cd doses	Grain Cd
	control	0	71
			53
			62
	Glycine	0	47
			43
			45
	aspargine	0	58
			50
			54
	citric acid	0	48
			44
			46
	control	3	10042
			9610
			9826
	Glycine	3	8563
			8319
			8441
	aspargine	3	7749
			7243
			7496
	citric acid	3	7333
			7091
			7212
	control	12	13827
			13441
			13634
	Glycine	12	12431
			11747
			12089
	aspargine	12	11975
			11399
			11687
	citric acid	12	14091
			13613
			13852

## Sheet: Grain Zn
	applications	soil Cd doses	Zn
	control	0	11.8
			10.4
			9
	Glycine	0	14.5
			12.9
			13.7
	aspargine	0	16.2
			12.8
			14.5
	citric acid	0	13.5
			9.9
			11.7
	control	3	12.9
			10.7
			11.8
	Glycine	3	14
			12.2
			13.1
	aspargine	3	17.4
			14.83
			16.1
	citric acid	3	14.1
			11.7
			12.9
	control	12	12.33
			15.3
			13.8
	Glycine	12	17
			14
			15.5
	aspargine	12	16.2
			14
			15.75
	citric acid	12	17.8
			15.52
			16.61

## Sheet: Grain Fe
	applications	soil Cd doses	Fe
	control	0	41.3
			33.9
			37.6
	Glycine	0	50.8
			44.4
			47.6
	aspargine	0	48.8
			39.6
			44.2
	citric acid	0	49.2
			42.3
			45.9
	control	3	41.6
			37.89
			39.3
	Glycine	3	55.3
			48.9
			52.1
	aspargine	3	56.2
			55.2
			55.91
	citric acid	3	56.6
			46.8
			51.7
	control	12	50.6
			42.2
			46.4
	Glycine	12	59.4
			49.8
			54.6
	aspargine	12	63
			54.4
			58.7
	citric acid	12	58.33
			50.6
			54.21

## Sheet: Grain Cu
	applications	soil Cd doses	Cu
	control	0	4.5
			3.9
			4.2
	Glycine	0	2.65
			3.14
			2.9
	aspargine	0	2.8
			2.4
			2.6
	citric acid	0	2.69
			2.2
			2.4
	control	3	5.4
			4.8
			5.1
	Glycine	3	3.8
			4.1
			3.75
	aspargine	3	4.63
			4.4
			4.51
	citric acid	3	3.9
			3.65
			3.78
	control	12	5.1
			3.9
			4.5
	Glycine	12	3.21
			2.59
			2.9
	aspargine	12	2.4
			2
			2.2
	citric acid	12	2.89
			2.72
			2.82

## Sheet: Grain Mn
	applications	soil Cd doses	Mn
	control	0	40.7
			34.1
			37.4
	Glycine	0	34.2
			31.05
			28.48
	aspargine	0	30.2
			24.6
			27.51
	citric acid	0	21.3
			28.6
			24.9
	control	3	38.01
			36.4
			37.26
	Glycine	3	30
			28.2
			29.1
	aspargine	3	29.8
			27.6
			28.7
	citric acid	3	27.3
			24.9
			26.1
	control	12	42.4
			36.2
			39.3
	Glycine	12	30.63
			28.17
			29.4
	aspargine	12	31.2
			25.4
			28.3
	citric acid	12	27.8
			25.8
			26.8
